# Supplementary material
Source: PubMed Central journal article supplement (PMC3304041)
Supplement: 11606_2011_1881_MOESM1_ESM.pdf [file 11606_2011_1881_MOESM1_ESM.pdf]

**Appendix 1: Patient-centered care educational objectives, activities, and methods for teaching and evaluation**

| <u>Objectives</u>                                                                                                                                                                                     | <u>Activities</u>                                                                                                                                                | <u>Teaching and Evaluation Methods</u>                                                                                 |
|-------------------------------------------------------------------------------------------------------------------------------------------------------------------------------------------------------|------------------------------------------------------------------------------------------------------------------------------------------------------------------|------------------------------------------------------------------------------------------------------------------------|
| 1. To understand and ensure safer and better transitions from hospital to home                                                                                                                        | Post-discharge telephone calls for all patients<br><br>Telephone calls to patients' primary care providers for all patients                                      | Small group discussion, review of evidence-based literature, and specially-designed Mini-Clinical Evaluation Exercises |
| 2. To become proficient in assessing patients' concerns and barriers to adherence to prescribed medications<br><br>3. To tailor treatment regimens to match patient preferences, goals, and abilities | Medication assessment and review with all patients<br><br><b>On 3 patients per team each month:</b> Pharmacy worksheet reviewing cost and complexity of regimens | Small group discussion, review of evidence-based literature, and specially-designed Mini-Clinical Evaluation Exercises |
| 4. To learn about social and functional elements of a patients' day-to-day lives that influence their medical care and outcomes                                                                       | <b>On 3 patients per team each month:</b> Visits to patients at home or subacute rehabilitation for selected patients                                            | Small group discussion, review of evidence-based literature, and supervised home visit                                 |

**Appendix 2: Housestaff perceptions of the value of a patient-centered care focused rotation (N=40)**

| Attitudes                                                                              | 'Agree' or 'Strongly Agree'* |      |
|----------------------------------------------------------------------------------------|------------------------------|------|
|                                                                                        | N                            | %    |
| My overall experience on the Aliko rotation was professionally valuable.               | 35                           | (90) |
| I felt that my time on the Aliko team was important to my medical training.            | 36                           | (90) |
| The Aliko rotation provided learning experiences not available during other rotations. | 35                           | (88) |
| I felt that the Aliko rotation was implemented effectively.                            | 32                           | (80) |
| I found the Aliko goals to be clear and understandable.                                | 34                           | (85) |
| My Aliko experience changed prior beliefs/impressions I had about my patients.         | 24                           | (60) |
| The behaviors emphasized on Aliko will influence my future practice.                   | 31                           | (78) |
| Aspects of my patient care were more patient-centered during the Aliko rotation.       | 35                           | (88) |
| Aspects of my patient care remained more patient-centered after the Aliko rotation.    | 31                           | (80) |

\* Response options included strongly agree, agree, neutral, strongly disagree, and disagree.

**Appendix 3: Housestaff open-ended comments of the value and influence of a patient-centered care focused rotation (n=40)**

| Questionnaire Category                                                                         | Housestaff Comments                                                                                                                                                                                                                                                                                                                                                                                                                                                                                                                                                                                                                       |
|------------------------------------------------------------------------------------------------|-------------------------------------------------------------------------------------------------------------------------------------------------------------------------------------------------------------------------------------------------------------------------------------------------------------------------------------------------------------------------------------------------------------------------------------------------------------------------------------------------------------------------------------------------------------------------------------------------------------------------------------------|
| Professional Value<br>and<br>Learning Experiences Not Available on Other Rotations             | <p><i>"I had the time to deliver the type of care I believe in, it restored my belief and enjoyment in becoming a doctor."</i> - PGY2</p> <p><i>"I was able to think about illness more from the patient's perspective and how their lives impact their disease management."</i> – PGY1</p> <p><i>"It gave me time to know my patients better. Gave the gift of time to really think about many more aspects of patient care, scrutinize their med list, visit their home, talk with them at length, speak with their physician, things that should be part of all patient care, but which I often feel too rushed to do."</i> - PGY2</p> |
| Aspects of My Care More Patient-Centered After Rotation<br>and<br>Influence on Future Practice | <p><i>"I am more comfortable calling PMDs and patients post-discharge. I understand the team approach and how to implement it."</i> - PGY1</p> <p><i>"I take more care in medication reconciliation, and ensuring that the patient and family understand dosing regimens."</i> – PGY3</p> <p><i>"I think more often about post-discharge planning and providing the next provider of care useful information to smooth transition."</i> - PGY2</p>                                                                                                                                                                                        |
